# Supplementary material for: A Transcriptional Regulatory Mechanism Finely Tunes the Firing of Type VI Secretion System in Response to Bacterial Enemies
Source: PubMed Central journal article supplement (PMC5565961; doi:10.1128/mbio.00559-17), 2017-08-22
Supplement: mbo004173445sf1.pdf [file mbo004173445sf1.pdf]

|                                                                 |                                                        |
|-----------------------------------------------------------------|--------------------------------------------------------|
| <b><i>Serratia marcescens</i> RM66262</b>                       | CTGCCAA <u>ATAGGAATCATCCGAA</u> TTAACAT ... 412 pb ATG |
| <b><i>Serratia marcescens</i> subsp. <i>marcescens</i> Db11</b> | CCACCAA <u>ATAGGAATCATCCGAA</u> TTAACAT... 391 pb ATG  |
| <b><i>Serratia marcescens</i> SM39</b>                          | CTACCAA <u>ATAGGAATCATCCGAA</u> TTAACAT ... 391 pb ATG |
| <b><i>Serratia marcescens</i> CAV1492</b>                       | CCACCAA <u>ATAGGAATCATCCGAA</u> TTCACAT... 412 pb ATG  |
| <b><i>Serratia marcescens</i> B3R3</b>                          | CCACCAA <u>ATAGGAATCATCCGAA</u> TTAACAT... 412 pb ATG  |
| <b><i>Serratia marcescens</i> WW4</b>                           | CGGCCAA <u>ATAGGAATCATCCGAA</u> TTAACAT ... 413 pb ATG |
| <b><i>Serratia marcescens</i> RCS-14</b>                        | AGGCCAA <u>ATAGGAATCATCCGAA</u> TTAACAT ... 413 pb ATG |
| <b><i>Serratia marcescens</i> SmUNAM836</b>                     | CTGCCAA <u>ATAGGAATCATCCGAA</u> TTAACAT ... 412 pb ATG |
| <b><i>Serratia marcescens</i> U363635</b>                       | CCACCAA <u>ATAGGAATCATCCGAA</u> TTAACAT ... 421 pb ATG |
| <b><i>Serratia marcescens</i> isolate PWN146</b>                | CCACCAA <u>ATAGGAATCATCCGAA</u> TTAACAT ... 412 pb ATG |
| <b><i>Serratia marcescens</i> SMB2099</b>                       | CCACCAA <u>ATAGGAATCATCCGAA</u> TTAACAT... 412 pb ATG  |
| <b><i>Serratia marcescens</i> AS1</b>                           | CCACCAA <u>ATAGGAATCATCCGAA</u> TTCACAT ... 412 pb ATG |
| <b><i>Serratia</i> sp. Fs14</b>                                 | CGGCCAA <u>ATAGGAATCATCCGAA</u> TTAACAT ... 413 pb ATG |
| <b><i>Serratia</i> sp. SCBI</b>                                 | CGGCCAA <u>ATAGGAATCATCCGAA</u> TTAACAT ... 413pb ATG  |
