# Supplementary material for: A Transcriptional Regulatory Mechanism Finely Tunes the Firing of Type VI Secretion System in Response to Bacterial Enemies
Source: PubMed Central journal article supplement (PMC5565961; doi:10.1128/mbio.00559-17), 2017-08-22

A

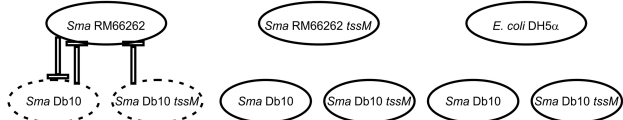

Attacker: *Sma* RM66262

*Sma* RM66262 *tssM*

*E. coli* DH5 $\alpha$

Target: *Sma* Db10

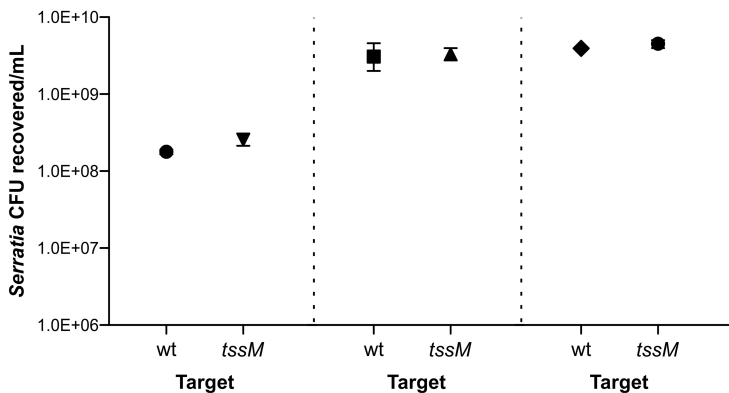

B

Attacker: *Sma* RM66262

Target: *Sma* Db10

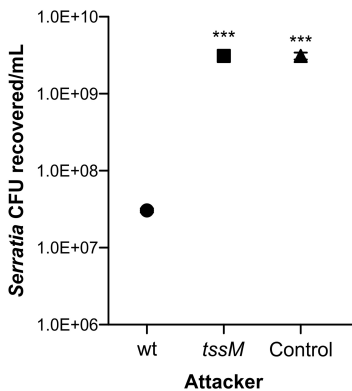

C

Attacker: *Sma* RM66262

Target: *Sma* Db10 *tssM*

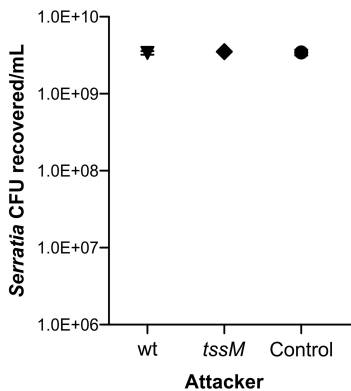

Supplement: mbo004173445sf4.pdf [file mbo004173445sf4.pdf]
