# Supplementary material for: A Transcriptional Regulatory Mechanism Finely Tunes the Firing of Type VI Secretion System in Response to Bacterial Enemies
Source: PubMed Central journal article supplement (PMC5565961; doi:10.1128/mbio.00559-17), 2017-08-22

A

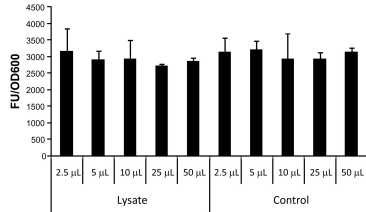

B

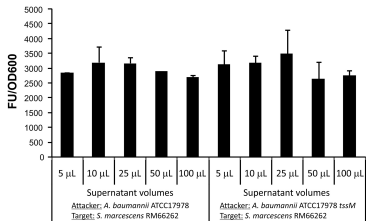

C

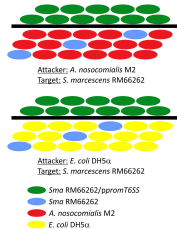

D

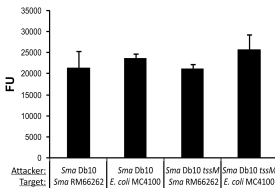

Supplement: mbo004173445sf6.pdf [file mbo004173445sf6.pdf]
